# Supplementary material for: Pupil’s perspectives on female genital cutting abandonment in Harari and Somali regions of Ethiopia
Source: PubMed Central journal article supplement (PMC6192353; doi:10.1186/s12905-018-0653-6), 2018-10-17
Supplement: 12905_2018_653_MOESM1_ESM.pdf [file 12905_2018_653_MOESM1_ESM.pdf]

**Additional file 1. Table not shown in the text**

**Knowledge of the study population towards FGC in Somali and Harari regions**

| Knowledge towards FGC                                   | Total Frequency<br>N=478 | Percent (%) | Regions         |                 | Gender     |            |
|---------------------------------------------------------|--------------------------|-------------|-----------------|-----------------|------------|------------|
|                                                         |                          |             | Harari<br>N=240 | Somali<br>N=238 | Male       | Female     |
| <b>Age of circumcision</b>                              |                          |             |                 |                 |            |            |
| At birth                                                | 24                       | 5           | 13(5.4%)        | 11(4.6%)        | 8(3.4%)    | 16(6.5%)   |
| 1-5 years                                               | 74                       | 15.5        | 35(14.6%)       | 39(16.4%)       | 30(12.9%)  | 44(17.9%)  |
| 6-14 yeas                                               | 219                      | 45.8        | 101(42.1%)      | 118(49.6%)      | 113(48.7%) | 106(43.1%) |
| >14 Years                                               | 47                       | 9.8         | 12(5.0%)        | 35(14.7%)       | 26(11.2%)  | 21(8.5%)   |
| I don` t know                                           | 114                      | 23.8        | 79(32.9%)       | 35(14.7%)       | 55(23.7%)  | 59(24.0%)  |
| <b>Type of FGC performed in the regions</b>             |                          |             |                 |                 |            |            |
| Sunna                                                   | 132                      | 27.6        | 26(10.8%)       | 106(44.5%)      | 73(31.5%)  | 59(24.0%)  |
| Infibulations                                           | 128                      | 26.8        | 42(17.5%)       | 86(36.1%)       | 52(22.4%)  | 76(30.9%)  |
| I don` t know                                           | 218                      | 45.6        | 172(71.7%)      | 46(19.3%)       | 107(46.1%) | 111(45.1%) |
| <b>The decision maker to perform FGC in the regions</b> |                          |             |                 |                 |            |            |
| Mother                                                  | 197                      | 41.2        | 69(28.8%)       | 128(53.8%)      | 95(40.9%)  | 102(41.5%) |
| Father                                                  | 25                       | 5.2         | 10(4.2%)        | 15(6.3%)        | 9(3.9%)    | 16(6.5%)   |
| Both                                                    | 165                      | 34.5        | 84(35.0%)       | 81(34.0%)       | 72(31.0%)  | 93(37.8%)  |
| I don` t know                                           | 91                       | 19          | 77(32.1%)       | 14(5.9%)        | 56(24.1%)  | 35(14.2%)  |
| <b>FGC performers</b>                                   |                          |             |                 |                 |            |            |
| Traditional practitioners                               | 351                      | 73.4        | 162(67.5%)      | 189(79.4%)      | 164(70.7%) | 187(76.0%) |
| Own Mother                                              | 21                       | 4.4         | 0(0%)           | 21(8.8%)        | 9(3.9%)    | 12(4.9%)   |
| Health professionals                                    | 17                       | 3.6         | 5(2.1%)         | 12(5.0%)        | 3(1.3%)    | 14(5.7%)   |
| I don` t know                                           | 89                       | 18.6        | 73(30.4%)       | 16(6.7%)        | 56(24.1%)  | 33(13.4%)  |

**Support towards the abandonment of FGC among Somali and Harari regions, eastern Ethiopia**

| Support towards the abandonment of FGC                                | Total Frequency<br>N=478 | Percent (%) | Regions    |            | Gender     |            |
|-----------------------------------------------------------------------|--------------------------|-------------|------------|------------|------------|------------|
|                                                                       |                          |             | Harari     | Somali     | Male       | Female     |
| Do you support the abandonment of FGC(n=478)                          |                          |             |            |            |            |            |
| Yes                                                                   | 391                      | 81.8        | 194(80.8%) | 197(82.8%) | 195(84.1%) | 196(79.7%) |
| No                                                                    | 87                       | 18.2%       | 46(19.2%)  | 41(17.2%)  | 37(15.9%)  | 50(20.3%)  |
| What is some of the efforts to support the abandonment of FGC (n=391) |                          |             |            |            |            |            |
| Community awareness                                                   | 381                      | 97.4        | 189(97.4%) | 192(97.5%) | 187(95.9%) | 194(99.0%) |
| Punishment                                                            | 10                       | 2.6         | 5(2.6%)    | 5(2.5%)    | 8(4.1%)    | 2(1.0%)    |
| The effort of the government (n=478)                                  |                          |             |            |            |            |            |
| Awareness to the community about the ill effect of FGC                | 218                      | 45.6        | 96(40.0%)  | 122(51.3%) | 101(43.5%) | 117(47.6%) |
| Took measure and punished the performers                              | 112                      | 23.4        | 72(30%)    | 40(16.8%)  | 54(23.3%)  | 58(23.6%)  |
| I don't know                                                          | 148                      | 31          | 72(30%)    | 76(31.9%)  | 77(32.2%)  | 71(28.9%)  |
| The Effort of the school (n=478)                                      |                          |             |            |            |            |            |
| Teaching in the classroom about the health risk of FGC                | 291                      | 60.9        | 129(53.8%) | 162(68.1%) | 139(59.9%) | 152(61.8%) |
| I don't know                                                          | 187                      | 39.1        | 111(46.2%) | 76(31.9%)  | 93(40.1%)  | 94(38.2%)  |
| The effort of young people (n=478)                                    |                          |             |            |            |            |            |
| Teaching the community about the harm of FGC                          | 201                      | 42.1        | 88(36.7%)  | 113(47.5%) | 99(42.7%)  | 102(41.5%) |
| To expose the performers to the police                                | 73                       | 15.3        | 47(19.6%)  | 26(10.9%)  | 41(17.7%)  | 32(13.0%)  |
| I don't know what to do                                               | 204                      | 42.7        | 105(43.8%) | 99(41.6%)  | 92(39.7%)  | 112(45.5%) |
| The responsible person for abandoning FGC *(n=478)                    |                          |             |            |            |            |            |
| The government                                                        | 246                      | 51.8        | 103(43.1%) | 143(60.6%) | 130(56.5%) | 116(47.3%) |
| The school                                                            | 104                      | 21.9        | 53(22.2%)  | 51(21.6%)  | 39(17.0%)  | 65(26.5%)  |
| The region administration                                             | 126                      | 26.5        | 60(25.1%)  | 66(28.0%)  | 42(18.3%)  | 84(34.3%)  |
| The family                                                            | 273                      | 57.5        | 144(60.3%) | 129(54.7%) | 123(53.5%) | 150(61.2%) |

\*All percentage in the responsible person for abandoning FGC is due to multiple responses
